# Supplementary material for: Effect of laminate structure on morphology and ethanol sensing properties of hierarchical zinc–cobalt layered double hydroxides
Source: Royal Society of Chemistry journal article supplement (doi:10.1039/d4nj00887a), 2024-01-01
Supplement: d4nj00887a1.pdf [file d4nj00887a1.pdf]

**Effect of laminate structure on morphology and ethanol  
sensing properties of hierarchical zinc-cobalt layered double  
hydroxides**

School of Materials Science and Engineering, Shaanxi Key Laboratory of Green  
Preparation and Functionalization for Inorganic Materials, Shaanxi University of  
Science and Technology, Xi'an, 710021, PR China

\* **Corresponding Author: Jing Lu**, E-mail addresses: [lujing@sust.edu.cn](mailto:lujing@sust.edu.cn)

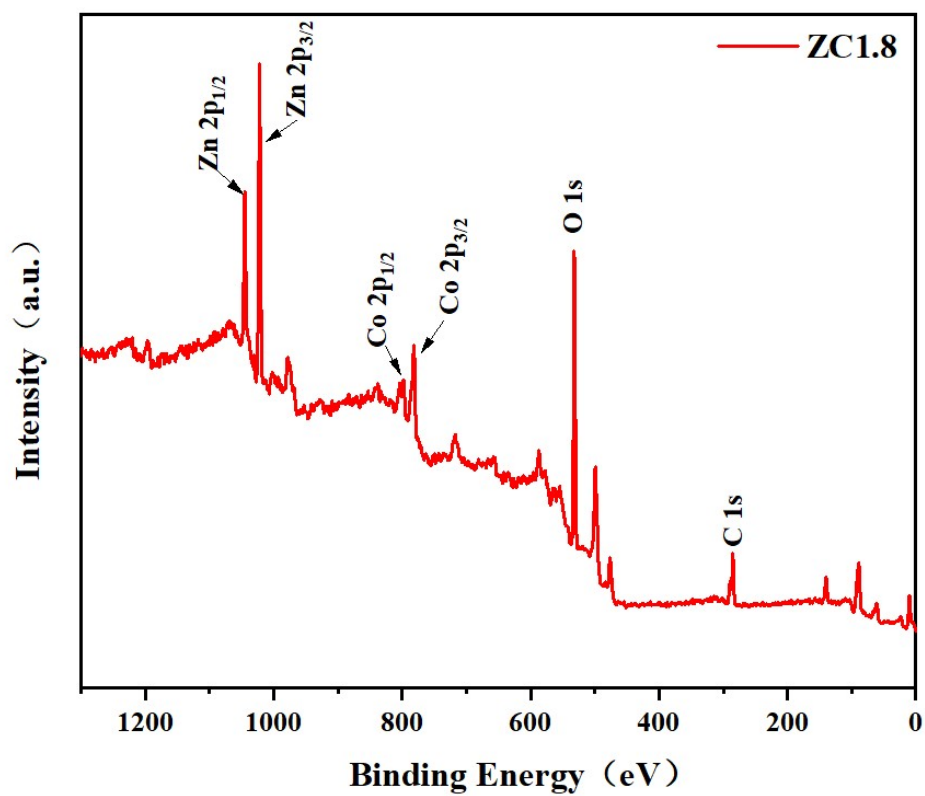

**Figure S1.** The XPS survey spectrum of the ZnCo-LDHs

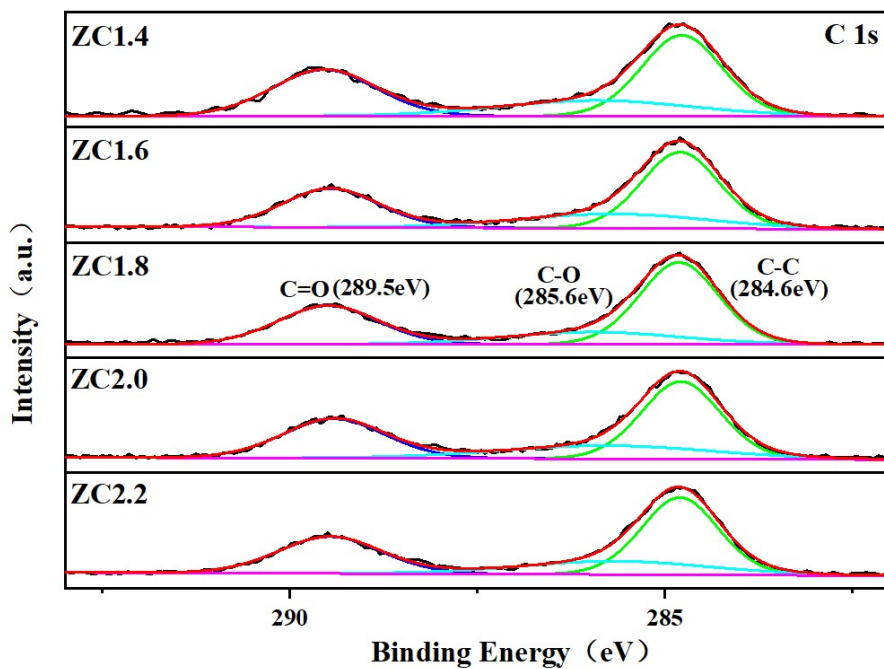

**Figure S2.** The C1s XPS spectra of the ZnCo-LDHs

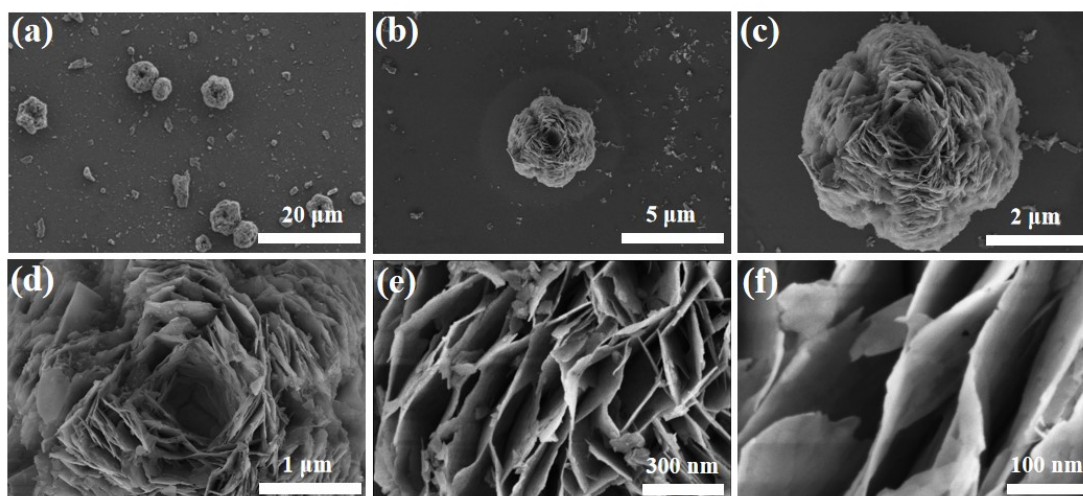

**Figure S3.** SEM images of ZC1.8 at different magnifications

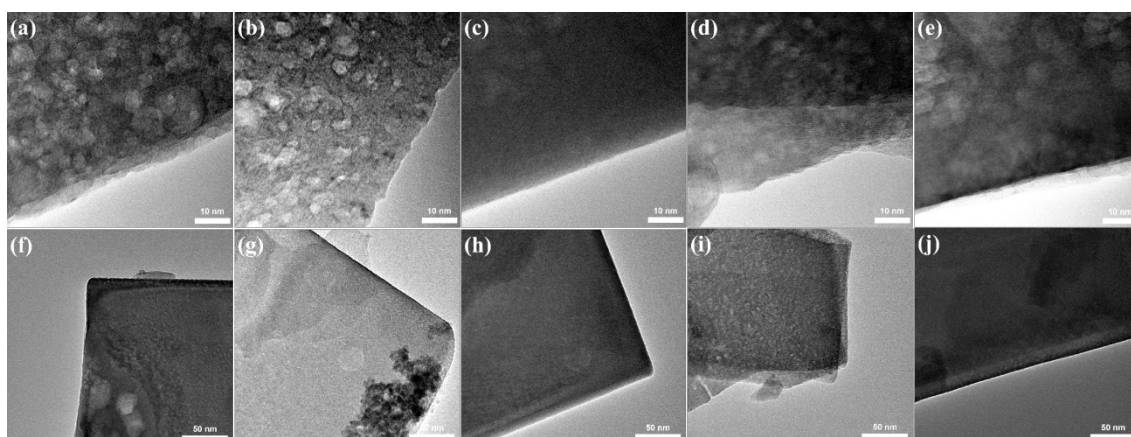

**Figure S4.** TEM images of ZnCo-LDHs at different magnifications:

(a,f)ZC1.4,(b,g)ZC1.6,(c,h)ZC1.8,(d,i)ZC2.0 and (e,j)ZC2.2

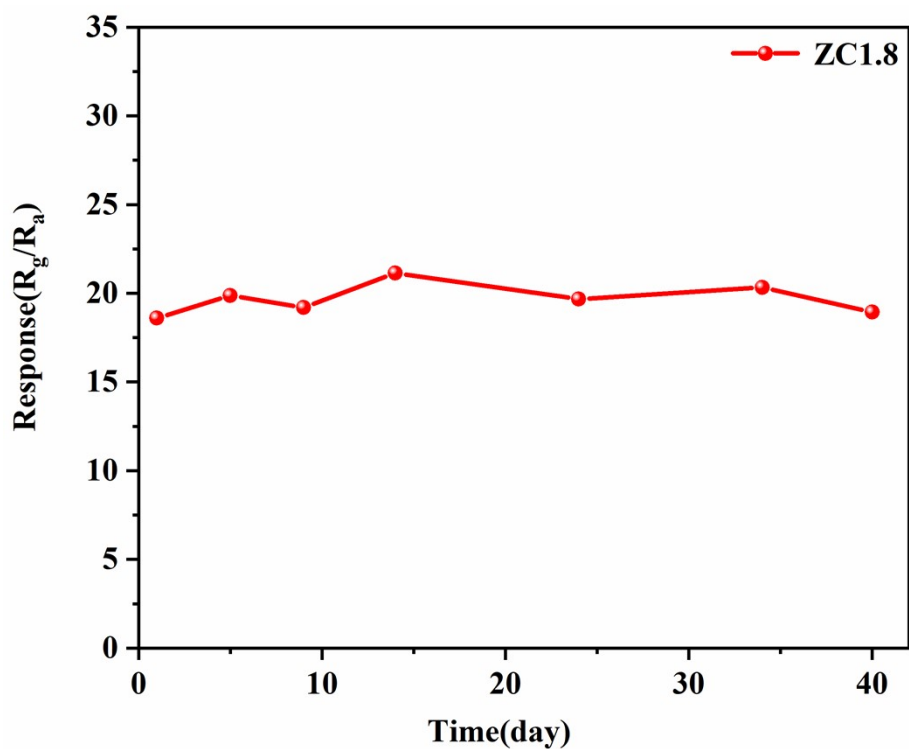

**Figure S5.** The stability of the ZC1.8 sensor for 200 ppm ethanol over 40 days

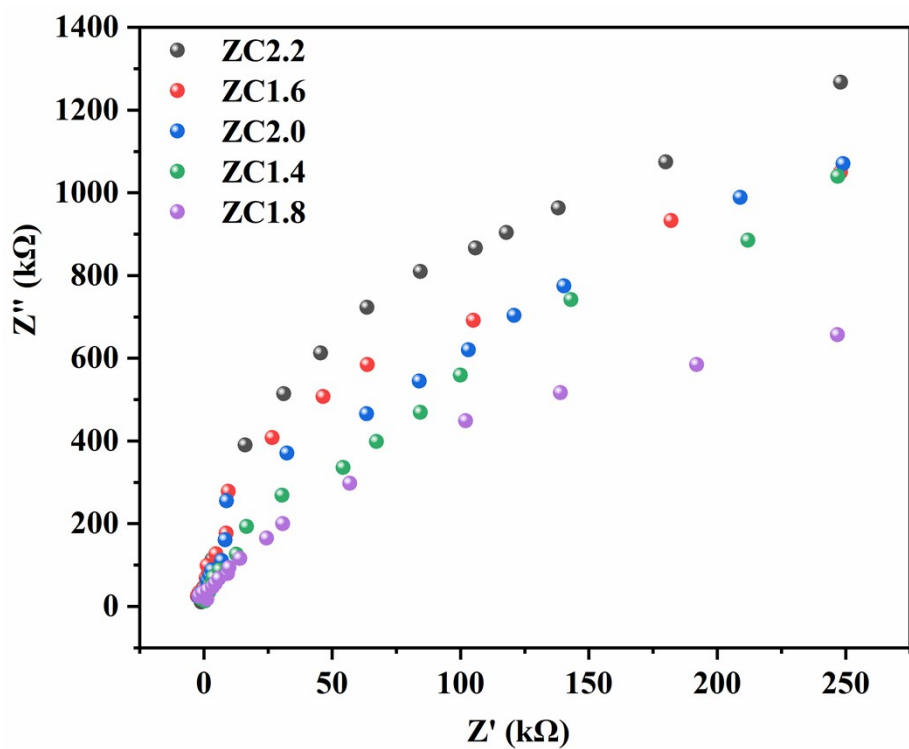

**Figure S6.** The electrochemical impedance spectra (EIS) Nyquist plots of ZnCo-LDHs

**Table S1** Comparison of the content of different oxygen-containing functional groups in ZnCo-LDHs

| Sample | oxygen vacancy | M-O (%) | O-H (%) |
|--------|----------------|---------|---------|
| ZC1.4  | 20.21          | 1.96    | 77.83   |
| ZC1.6  | 22.18          | 2.27    | 75.55   |
| ZC1.8  | 28.67          | 5.64    | 65.69   |
| ZC2.0  | 14.82          | 2.33    | 82.85   |
| ZC2.2  | 15.58          | 1.15    | 83.27   |
